# Supplementary material for: Cleome rutidosperma and Euphorbia thymifolia Suppress Inflammatory Response via Upregulation of Phase II Enzymes and Modulation of NF-κB and JNK Activation in LPS-Stimulated BV2 Microglia
Source: MDPI journal article supplement (doi:10.3390/ijms17091420), 2016-08-27
Supplement: s1 [file s1]

# Supplementary Materials: *Cleome rutidosperma* and *Euphorbia thymifolia* Suppress Inflammatory Response via Upregulation of Phase II Enzymes and Modulation of NF- $\kappa$ B and JNK Activation in LPS-Stimulated BV2 Microglia

Hsiou-Yu Ding Pei-Shan Wu and Ming-Jiuan Wu

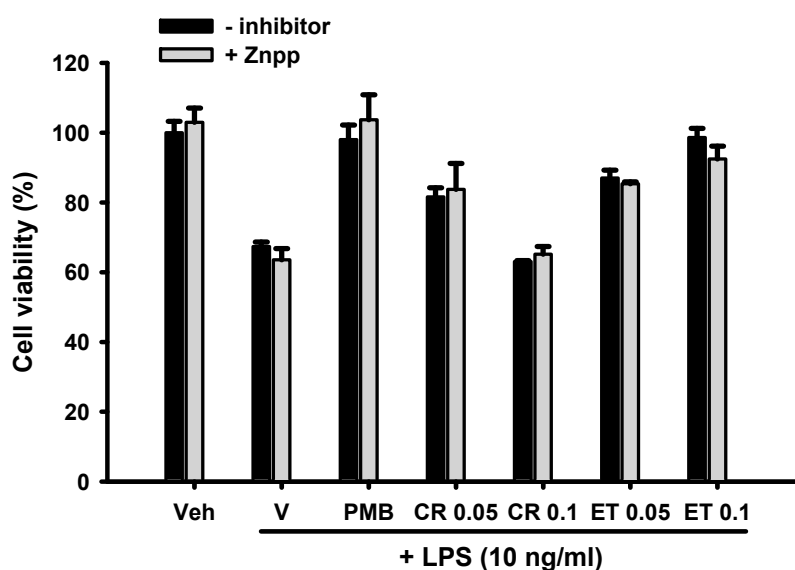

**Figure S1.** Effect of HO-1 inhibitor, Znpp, on the cell viability of BV2. BV2 cells were pre-treated with Znpp (5  $\mu$ M) for 30 min, followed by PMB (10  $\mu$ g/mL), CR or ET (0.05 and 0.1 mg/mL) treatment for further 30 min, prior to LPS (10 ng/mL) challenge for 20 h. Cell viability was determined by MTT assay. Data are represented as the mean  $\pm$  SD ( $n = 3$ ).
